# Supplementary material for: Economic Evaluation of an Internet-Based Stress Management Intervention Alongside a Randomized Controlled Trial
Source: PubMed Central journal article supplement (PMC6707573; doi:10.2196/10866), 2019-05-15
Supplement: mental_v6i4e10866_app1.pdf [file mental_v6i4e10866_app1.pdf]

Unit costs for the type of health service utilized by the participants.

| Health service type                 | Costs in € <sup>a</sup> per contact |
|-------------------------------------|-------------------------------------|
| Physician                           | 20.57                               |
| Gynecologist                        | 31.27                               |
| Orthopedist                         | 25.53                               |
| Specialists for internal medicine   | 63.53                               |
| Ophthalmologist                     | 36.55                               |
| Dermatologist                       | 19.36                               |
| ETN specialist                      | 27.80                               |
| Surgeon                             | 44.09                               |
| Urologist                           | 25.20                               |
| Neurologist                         | 46.49                               |
| Psychotherapist                     | 78.53                               |
| Dentist                             | 54.62                               |
| Logopedics or speech therapy        | 40.56                               |
| Physiotherapy                       | 17.30                               |
| Ergotherapy or occupational therapy | 39.01                               |
| Mean remedies                       | 32.29                               |
|                                     | Costs, € <sup>a</sup> per day       |
| General hospital, inpatient         | 648.11                              |
| Mental hospital, inpatient          | 348.26                              |
| General hospital, day patient       | 421.27                              |
| Mental hospital, day patient        | 226.37                              |
| Rehabilitation, outpatient          | 49.43                               |
| Rehabilitation, day patient         | 93.81                               |
| Rehabilitation, inpatient           | 138.19                              |

<sup>a</sup> Unit costs were calculated for the year 2013 [49] or adjusted by the German consumer price index for 2013

This is a Multimedia Appendix to a full manuscript published in the J Med Internet Res for Mental Health. For full copyright and citation information see <http://dx.doi.org/10.2196/jmir.10866>
