# Supplementary material for: Economic Evaluation of an Internet-Based Stress Management Intervention Alongside a Randomized Controlled Trial
Source: PubMed Central journal article supplement (PMC6707573; doi:10.2196/10866), 2019-05-15
Supplement: mental_v6i4e10866_app2.pdf [file mental_v6i4e10866_app2.pdf]

Demographic characteristics: means/counts, standard deviations/percentages at baseline.

|                                         | All (N=264), |             | Internet-based stress management intervention (n=132) |             | Waitlist control condition (n=132) |             |
|-----------------------------------------|--------------|-------------|-------------------------------------------------------|-------------|------------------------------------|-------------|
|                                         | N (%)        | mean (SD)   | n (%)                                                 | mean (SD)   | n (%)                              | mean (SD)   |
| <b>Sociodemographic Characteristics</b> |              |             |                                                       |             |                                    |             |
| Age                                     | —            | 43.3 (10.2) | —                                                     | 42.4 (10.7) | —                                  | 44.2 (9.6)  |
| Gender, female, n (%)                   | 193 (73.1)   | —           | 97 (73.5)                                             | —           | 96 (72.7)                          | —           |
| Married/Partnership                     | 160 (60.6)   | —           | 80 (60.6)                                             | —           | 80 (60.6)                          | —           |
| <b>Experience</b>                       |              |             |                                                       |             |                                    |             |
| Experience with health trainings        | 34 (12.9)    | —           | 17 (12.9)                                             | —           | 17 (12.9)                          | —           |
| Previous psychotherapy                  | 95 (36.0)    | —           | 52 (39.4)                                             | —           | 43 (32.6)                          | —           |
| Current psychotherapy                   | 16 (6.1)     | —           | 5 (3.8)                                               | —           | 11 (8.3)                           | —           |
| <b>Work Characteristics</b>             |              |             |                                                       |             |                                    |             |
| Years of work experience                | —            | 18.1 (11.1) | —                                                     | 17.2 (10.8) | —                                  | 18.9 (11.2) |
| Full-time employed                      | 204 (77.3)   | —           | 105 (79.5)                                            | —           | 99 (75.0)                          | —           |
| Part-time employed                      | 57 (21.6)    | —           | 25 (18.9)                                             | —           | 32 (24.2)                          | —           |
| On sick leave                           | 3 (1.1)      | —           | 2 (1.5)                                               | —           | 1 (0.8)                            | —           |
| <b>Work sectors</b>                     |              |             |                                                       |             |                                    |             |
| Social                                  | 97 (36.7)    | —           | 48 (36.4)                                             | —           | 49 (37.1)                          | —           |
| Service                                 | 43 (16.3)    | —           | 21 (15.9)                                             | —           | 22 (16.7)                          | —           |
| Health                                  | 36 (13.6)    | —           | 22 (16.7)                                             | —           | 14 (10.6)                          | —           |
| Economy                                 | 31 (11.7)    | —           | 14 (10.6)                                             | —           | 17 (12.9)                          | —           |
| IT                                      | 15 (5.7)     | —           | 8 (6.1)                                               | —           | 7 (5.3)                            | —           |
| Others                                  | 42 (16.0)    | —           | 19 (14.3)                                             | —           | 23 (17.4)                          | —           |

This is a Multimedia Appendix to a full manuscript published in the J Med Internet Res for Mental Health. For full copyright and citation information see <http://dx.doi.org/10.2196/jmir.10866>
